# Supplementary material for: Diagnostic Value of Pleural Effusion Mononuclear Cells Count and Adenosine Deaminase for Tuberculous Pleurisy Patients in China: A Case-Control Study
Source: Front Med (Lausanne). 2019 Dec 17;6:301. doi: 10.3389/fmed.2019.00301 (PMC6927933; doi:10.3389/fmed.2019.00301)
Supplement: Supplementary file 1 [file Table_1.xls]

## Sheet: Sheet1
Basic information, Mononuclear cells count and ADA of 205 patients
Serial number	Hospital numbers	Name	Gender	Age（Y）	pleural effusion ADA count (U/L)	pleural effusion mononuclear cells count (×10^6/L)	Tobacco	Alcoholism	Diabetes	Hypertension	Arrhythmia	Coronary heart disease	Chronic gastritis	Brain infarction	Copd	Bronchial asthma	Rheumatologic disease	Hyperthyroidism	Solid tumor	Chronic viral hepatitis B	Prior TB treatment	Previous TB infection history	HIV infection	Prior glucocorticoid use	Diagnosis	Group
1	0001638685	魏素真	Female	69	14	659	-	-	-	+	+	-	-	-	-	-	-	+	-	-	-	-	-	-	Pneumonia effusion	0
2	0001686904	宋文才	Male	69	5	600	+	+	-	-	+	-	-	-	-	-	-	-	-	-	-	-	-	-	Salivary gland carcinoma	0
3	0001691007	张保森	Male	67	34	101	+	-	-	-	-	-	-	-	-	-	-	-	-	-	-	-	-	-	Pneumonia effusion	0
4	0001690916	张保灵	Male	73	10	482	+	-	-	-	-	-	-	-	-	-	+	-	-	-	-	-	-	-	Pneumonia effusion	0
5	0001692872	张玉兰	Female	70	5	1168	-	-	-	+	+	+	-	+	-	+	-	-	-	-	-	-	-	-	Ovarian cancer	0
6	0001701007	连炳玉	Male	47	16.8	1970	-	-	-	-	-	-	-	-	-	-	-	-	-	-	+	-	-	-	Mesothelioma	0
7	0001711101	王天顺	Male	68	8	324.8	+	-	-	-	-	-	+	-	-	-	-	-	-	-	-	-	-	-	Lung adenocarcinoma	0
8	0001716027	王有富	Male	69	38	5618	-	-	-	-	-	-	-	-	-	-	-	-	-	-	-	-	-	-	TBP	1
9	0001724208	李亚星	Female	19	135	2568	-	-	-	-	-	-	-	-	-	-	-	-	-	-	-	-	-	-	Lymphoma	0
10	0001727485	李建国	Male	65	7	73.8	-	-	-	-	-	-	-	-	-	-	-	-	-	-	-	-	-	-	Pneumonia effusion	0
11	0001741073	南凯	Male	23	23	2037	+	-	-	-	-	-	-	-	-	-	-	-	-	-	-	-	-	-	TBP and pulmonary TB	1
12	0001741123	张文轩	Male	28	45	1031.4	-	-	-	-	-	-	-	-	-	-	-	-	-	-	-	-	-	-	TBP	1
13	0001743220	张西金	Male	82	40	326	+	-	-	+	-	+	-	-	-	-	-	-	-	-	-	-	-	-	Empyema	0
14	0001744532	徐学成	Male	78	3	969.6	+	+	-	-	+	-	-	+	-	-	-	-	-	-	-	-	-	-	Pneumonia effusion	0
15	0001754382	刘贵兰	Female	68	9	292	-	-	-	-	-	-	-	-	-	-	-	-	-	+	+	-	-	-	Lung adenocarcinoma	0
16	0001754758	吴来军	Male	54	10	4176	+	+	-	-	-	-	-	-	-	-	-	-	-	-	-	-	-	-	TBP	1
17	0001758822	侯宁宁	Female	21	49	769	-	-	-	-	-	-	-	-	-	-	-	-	-	-	-	-	-	-	TBP	1
18	0001758562	孙明海	Male	59	44	1594	+	+	-	-	-	-	-	-	-	-	-	-	-	-	-	-	-	-	TBP	1
19	0001760425	王翠玲	Female	62	8	1477	-	-	+	-	-	-	-	-	-	-	-	-	-	-	-	-	-	-	Lung adenocarcinoma	0
20	0001763180	陈玉莲	Female	61	45	2357	-	-	-	-	-	-	-	-	-	-	-	-	-	-	-	-	-	-	TBP	1
21	0001769221	金正	Male	19	60	7579	+	-	-	-	-	-	-	-	-	-	-	-	-	-	-	-	-	-	TBP	1
22	0001773049	张贝贝	Male	34	29	563	+	+	-	+	-	-	-	-	-	-	-	-	-	-	-	-	-	-	TBP	1
23	0001766633	刘鸿宾	Male	72	27	4995	+	+	-	-	-	-	-	-	-	-	-	-	-	-	-	-	-	-	Constrictive pericarditis	0
24	0001776912	李万全	Male	65	321	245391	+	-	-	+	-	-	-	-	-	-	-	-	-	-	-	-	-	-	Empyema	0
25	0001777221	郝保玉	Male	51	15	1264	+	+	-	-	-	-	-	-	-	-	-	-	-	-	-	+	-	-	Mesothelioma	0
26	0001783382	崔雪美	Female	51	40	1716	-	-	-	-	-	-	-	-	-	-	-	-	-	-	-	-	-	-	TBP and Left pulmonary TB	1
27	0001784412	刘兴臣	Male	70	6	372	+	-	-	+	-	-	+	-	-	-	-	-	-	-	-	-	-	-	Pneumonia effusion	0
28	0001784942	王霞	Female	39	41	5218	-	-	-	-	-	-	-	-	-	-	-	-	-	-	-	-	-	-	TBP	1
29	0001798164	李云冲	Male	20	36	2548	+	+	-	-	-	-	-	-	-	-	-	-	-	-	-	-	-	-	TBP	1
30	0001812555	范根全	Male	73	12	1306	+	+	-	-	+	-	-	-	-	-	-	-	-	-	-	+	-	-	Lung adenocarcinoma	0
31	0001812835	绳振荣	Female	55	8.7	964	-	-	-	-	-	-	-	-	-	-	-	-	-	-	-	-	-	-	Lung adenocarcinoma	0
32	0001814570	陈洪洋	Male	72	82	544	+	+	-	-	-	-	-	-	-	-	-	-	-	-	-	-	-	-	TBP	1
33	0001815142	景振生	Male	57	10	1318	+	-	-	+	-	-	-	+	-	-	-	-	-	-	-	-	-	-	Mesothelioma	0
34	0001823041	陈东生	Male	47	18	3684	+	+	-	-	-	-	-	-	-	-	-	-	-	-	-	-	-	-	Lung adenocarcinoma	0
35	0001607119	焦臣合	Male	57	37	1812	+	-	-	+	-	-	-	+	-	-	-	-	-	+	-	-	-	-	TBP	1
36	0001609941	汪礼君	Male	53	43	561	+	+	-	-	-	-	-	-	-	-	-	-	-	-	-	-	-	-	TBP	1
37	0001611114	文修德	Male	73	11	1258	+	-	+	+	-	+	-	-	-	-	-	-	-	-	+	-	-	-	Lung adenocarcinoma	0
38	0001613394	马秀英	Female	54	43.4	3926.4	-	-	-	-	-	-	-	-	-	-	-	-	-	-	+	-	-	-	TBP	1
39	0001619043	彭仁兵	Male	54	41	3792	-	-	+	+	-	-	-	+	-	-	-	-	-	-	+	-	-	-	TBP	1
40	0001618982	方美英	Female	71	4	182	-	-	-	+	-	-	-	-	-	-	-	-	-	-	-	-	-	-	Liver cirrhosis	0
41	0001625295	朱永强	Male	26	6	186.8	-	-	-	-	-	-	-	-	-	-	-	-	-	-	-	-	-	-	Constrictive pericarditis	0
42	0001633335	郭松山	Male	33	35.4	3071	-	-	-	-	-	-	-	-	-	-	-	-	-	-	+	-	-	-	TBP	1
43	0001632625	秋国锋	Male	64	6	411	-	-	-	-	-	+	+	-	-	-	-	-	-	-	-	-	-	-	Lung adenocarcinoma	0
44	0001632200	许均来	Male	88	13.2	1937.15	-	-	-	-	-	-	-	-	-	-	-	-	-	-	-	-	-	-	TBP	1
45	0001637180	郭全礼	Male	63	96	347.8	+	+	-	-	-	-	-	-	-	-	-	-	-	-	-	-	-	-	Pneumonia effusion	0
46	0001639449	张国厚	Male	70	19.6	4967	+	+	-	-	-	-	-	-	-	-	-	-	-	-	+	-	-	-	Microscopic polyangiitis	0
47	0001657347	赵连俊	Male	83	5	912.05	+	-	-	-	+	+	-	-	-	-	-	-	-	-	-	-	-	-	Heart failure	0
48	0001657381	裴松芝	Female	59	9	2307	-	-	-	-	-	-	-	-	-	-	-	-	-	-	-	-	-	-	Lung adenocarcinoma	0
49	0001670293	陈玉柱	Male	51	37	1738	-	-	-	-	-	-	-	-	-	-	-	-	-	-	-	-	-	-	TBP	1
50	0001859044	翟丰生	Male	66	57	1461	+	-	-	+	-	-	-	-	-	-	-	-	-	-	-	-	-	-	TBP	1
51	0001865435	孙永木	Male	62	9.7	1483	-	-	-	-	+	-	-	-	-	-	-	-	-	-	-	-	-	-	TBP	1
52	0001850207	王国安	Male	72	32	1993	+	+	-	+	-	-	-	+	-	-	-	-	-	-	-	-	-	-	TBP	1
53	0001645191	陈双喜	Male	62	24	2995	+	+	-	-	-	-	-	-	-	-	-	-	-	-	-	-	-	-	Pneumonia effusion	0
54	0001649552	高德成	Male	69	8	109.9	-	-	-	+	-	-	-	-	-	-	-	-	-	-	-	-	-	-	Thoracic cyst	0
55	0001650079	徐栓紧	Male	65	10	0	+	-	+	+	-	-	-	+	-	-	-	-	-	-	-	-	-	-	Pneumonia effusion	0
56	0001651766	于秋娟	Female	33	29.9	2599.2	-	-	-	-	-	-	-	-	-	-	-	-	-	-	-	-	-	-	TBP	1
57	0001631190	许清法	Male	68	46.5	346	-	+	+	+	-	-	-	-	-	-	-	-	-	-	-	-	-	-	TBP	1
58	0001653697	郭太兴	Male	71	7.7	138	-	-	-	+	-	-	-	-	+	+	-	-	-	-	-	-	-	-	Mesothelioma	0
59	0001568384	赵建设	Male	49	11	2874	-	-	-	-	-	-	-	-	-	-	-	-	-	-	-	-	-	-	Lymphoma	0
60	0001574663	韩帮虎	Male	34	37	62	-	-	-	-	-	-	-	-	-	-	-	-	-	-	+	-	-	-	Pneumonia effusion	0
61	0001574483	刘俊领	Male	21	55	1929	+	+	-	-	-	-	-	-	-	-	-	-	-	-	-	-	-	-	TBP	1
62	0001576294	柴铁良	Male	80	7	74.25	-	-	-	+	-	-	-	-	-	-	-	-	-	-	+	-	-	-	TBP	1
63	0001365832	薛小建	Male	54	16	478.4	+	-	-	-	-	-	-	-	-	-	-	-	-	-	-	-	-	-	Pneumonia effusion	0
64	1837244	王彤	Male	49	36.5	602	+	+	+	-	-	-	-	-	-	-	-	-	-	-	-	-	-	-	Pneumonia effusion	0
65	1840588	胡明义	Male	70	13	3361	+	+	-	-	-	-	-	-	-	-	-	-	-	-	-	-	-	-	Lung adenocarcinoma	0
66	1841991	温玉飞	Male	46	11.5	921	+	+	-	-	-	-	-	-	-	-	-	-	-	-	-	-	-	-	Pneumonia effusion	0
67	0001296008	刘国栋	Male	43	47	647	+	-	-	-	-	-	-	-	-	-	-	-	-	-	+	-	-	+	TBP and right pulmonary TB	1
68	0001311985	侯知么	Male	72	28.6	1270	-	-	+	+	-	-	-	-	-	-	-	-	-	-	-	-	-	-	TBP	1
69	0001316851	肖寒	Female	23	46	4397.05	-	-	-	-	-	-	-	-	-	-	-	-	-	-	-	-	-	-	TBP	1
70	0001317339	马建升	Male	61	9	3741	+	-	+	-	-	+	-	-	-	-	-	-	-	-	-	-	-	-	Lung adenocarcinoma	0
71	0001308281	杨瑞荣	Female	48	8	1	-	-	-	-	-	-	-	-	-	-	-	-	-	-	-	-	-	-	Pneumonia effusion	0
72	0001329070	周华	Female	68	10.2	1339	-	-	+	-	-	-	-	-	-	-	-	-	-	-	-	-	-	-	Breast cancer	0
73	0001337208	史香梅	Female	74	32.7	2162	-	-	-	+	-	-	-	-	-	-	-	-	-	-	-	-	-	-	TBP	1
74	0001343801	郭群英	Female	63	39.4	12	-	-	-	-	-	-	-	-	-	-	-	-	-	-	+	-	-	-	TBP	1
75	0001349170	曹永泉	Male	62	18.3	117.9	+	+	+	+	-	+	-	-	-	-	-	-	-	-	-	-	-	-	TBP	1
76	0001355786	范祖会	Male	59	8.1	342	+	+	-	-	-	-	-	-	-	-	-	-	-	-	-	-	-	-	Lung adenocarcinoma	0
77	0001356773	杨梅	Female	65	8.6	186	-	-	-	-	-	-	-	-	-	-	-	-	-	+	+	-	-	-	Lung adenocarcinoma	0
78	0001359816	刘永兴	Male	78	6.4	1221	-	+	+	-	-	-	-	-	-	-	-	-	-	-	-	-	-	-	Mesothelioma	0
79	0001360103	王广志	Male	67	17	4321	+	+	-	-	-	-	-	-	-	-	-	-	-	-	+	-	-	-	Mesothelioma	0
80	0001358864	王萍	Female	27	75	0	-	-	-	-	-	-	-	-	-	-	-	-	-	-	-	-	-	-	TBP	1
81	0001364013	单瑞忠	Male	72	36.9	578.2	+	-	-	-	-	-	-	-	-	-	-	-	-	-	+	+	-	-	Lung adenocarcinoma	0
82	0001366639	司建珂	Male	21	42.6	5236.83	-	-	-	-	-	-	-	-	-	-	-	-	-	-	-	-	-	-	TBP	1
83	0001352599	殷小芳	Female	45	64.7	1146.6	-	-	-	-	-	-	-	-	-	-	-	-	-	-	-	-	-	-	TBP	1
84	0001372982	王天妮	Male	66	32.3	4410	-	-	-	-	-	-	-	-	-	-	-	-	-	-	+	-	-	-	TBP	1
85	0001370867	姜兰英	Female	76	7.7	1431	-	-	-	-	-	-	-	-	-	-	+	-	-	-	-	-	-	-	TBP	1
86	0001372998	藏亚歌	Female	18	64	503	-	-	-	-	-	-	-	-	-	-	-	-	-	-	-	-	-	-	TBP	1
87	0001378081	贾长友	Male	51	79.2	86	-	-	-	-	-	-	-	-	-	-	-	-	-	-	+	-	-	-	TBP	1
88	0001379872	李占勇	Male	25	41.2	5098	+	+	-	-	-	-	-	-	-	-	-	-	-	-	-	-	-	-	TBP	1
89	0001384489	王磊杰	Male	26	37.7	2684	+	-	-	-	-	-	-	-	-	-	-	-	-	-	-	-	-	-	TBP and pulmonary TB	1
90	0001386804	张志峰	Male	67	16.2	1075	+	-	-	+	-	-	-	-	-	-	-	-	-	-	-	-	-	-	TBP	1
91	0001387227	段陆涛	Male	27	31.4	194.4	-	-	-	-	-	-	-	-	-	-	-	-	-	-	-	-	-	-	Pneumonia effusion	0
92	0001393189	刘明海	Male	50	25	2444	+	+	-	+	-	-	-	-	-	-	-	-	-	-	-	-	-	-	TBP	1
93	0001394818	陈双新	Male	52	34	162	+	+	-	-	-	-	-	-	-	-	-	-	-	-	-	-	-	-	Pneumonia effusion	0
94	0001399253	陈崇军	Male	49	58	3370.4	-	-	-	-	-	-	-	-	-	-	-	-	-	-	-	-	-	-	TBP	1
95	0001401601	万泉	Male	25	39.6	1136	+	+	-	-	-	-	-	-	-	-	-	-	-	-	-	-	-	-	TBP	1
96	0001402136	刘士珍	Male	64	43	3331.15	+	-	-	-	-	-	-	-	-	-	-	-	-	-	-	-	-	-	TBP	1
97	0001406022	朱晓敏	Female	36	11.6	688	-	-	-	-	-	-	-	-	-	-	-	-	-	-	+	-	-	-	Breast cancer	0
98	0001407142	王文焕	Male	72	22.8	2366	-	-	-	-	-	-	-	-	-	-	-	-	-	-	-	-	-	-	Lymphoma	0
99	0001408513	李功凤	Female	57	35	5294.7	-	-	-	-	-	-	-	-	-	-	-	-	-	-	-	-	-	-	TBP	1
100	0001408747	张希涛	Male	19	93	2875	-	-	-	-	-	-	-	-	-	-	-	-	-	-	-	-	-	-	TBP	1
101	0001410586	胡本铎	Male	58	32.6	143	+	+	-	-	-	-	-	-	-	-	-	-	-	-	-	-	-	-	Pneumonia effusion	0
102	0001412315	平丽鹏	Male	27	12	712	-	-	-	-	-	-	-	-	-	-	-	-	-	-	-	-	-	-	TBP	1
203	0001416407	王云中	Male	53	48	1408	+	+	+	-	-	-	-	-	-	-	-	-	-	-	-	-	-	-	TBP	1
104	0001413871	侯兴杰	Male	52	16.7	389.3	+	+	+	-	-	-	-	-	-	-	-	-	-	-	-	-	-	-	Pneumonia effusion	0
105	0001412966	杨龙飞	Male	26	34.3	1173.2	-	-	-	-	-	-	-	-	-	-	-	-	-	-	-	-	-	-	Tuberculous empyema	1
106	0001421306	赵光升	Male	35	57.3	5123	-	+	-	-	-	-	-	-	-	-	-	-	-	+	-	-	-	-	TBP and Left pulmonary TB	1
107	0001416964	尹留聚	Male	52	70	70	-	-	-	-	-	-	-	-	-	-	-	-	-	+	-	-	-	-	Empyema	0
108	0001427412	潘兵	Male	33	32.6	1597.6	+	+	-	-	-	-	-	-	-	-	-	-	-	-	-	-	-	-	TBP	1
109	0001427111	霍柏全	Male	54	32.3	6017.3	+	-	-	+	-	-	-	-	-	-	-	-	-	-	-	-	-	-	TBP	1
110	0001329070	杨廷华	Female	69	8.2	1841	-	-	+	-	-	-	+	-	-	-	-	-	+	-	-	-	-	-	Breast cancer	0
111	0001430717	孙新才	Male	49	48	2521	-	+	-	-	-	-	-	-	-	-	-	-	-	-	-	-	-	-	TBP	1
112	0001433274	李树训	Male	58	80	10465	+	+	-	+	-	-	-	+	-	-	-	-	-	-	-	-	-	-	TBP	1
113	0001432933	邓国超	Male	31	15	1836	-	-	-	-	-	-	-	-	-	-	-	-	-	-	+	-	-	-	TBP	1
114	0001432366	马景先	Female	40	29	1117.75	-	-	-	-	-	-	-	-	-	-	-	-	-	-	-	-	-	-	TBP	1
115	0001432188	罗二涛	Male	27	354	117262	-	-	-	-	-	-	-	-	-	-	-	-	-	-	-	-	-	-	Empyema	0
116	0001441402	刘进芳	Male	58	9	3257	-	-	-	-	-	-	-	-	-	-	+	-	-	-	-	-	-	-	Lung adenocarcinoma	0
117	0001441285	王汉林	Male	61	24.4	4090	+	-	-	-	-	-	-	-	-	-	-	-	-	-	-	-	-	-	TBP	1
118	0001441988	毛俊堂	Male	81	44	1008	-	-	-	+	-	-	-	-	-	-	-	-	-	-	-	-	-	-	TBP	1
119	0001448171	梁振杰	Male	57	44	3424	-	-	-	-	-	-	-	-	-	-	-	-	-	-	-	-	-	-	TBP	1
120	0001449321	袁雄	Male	25	49	4183.2	-	-	-	-	-	-	-	-	-	-	-	-	-	-	-	-	-	-	TBP	1
121	0001445459	韩文堂	Male	60	142.1	10952	+	-	-	-	-	-	-	-	-	-	-	-	-	-	-	-	-	-	Empyema	0
122	0001451987	仝绪琛	Male	45	7.2	658	-	-	-	-	-	-	-	-	-	-	-	-	-	-	-	-	-	-	TBP	1
123	0001452046	杨凤魁	Male	74	15	1962	-	-	-	-	-	-	-	-	-	-	-	-	+	-	-	-	-	-	TBP	1
124	0001455587	宋明亮	Male	55	31.3	1790.75	-	-	+	+	-	-	-	-	-	-	-	-	-	-	-	-	-	-	TBP	1
125	0001460442	李秋重	Male	70	20.4	20	+	+	-	-	-	-	-	-	-	-	-	-	-	-	-	-	-	-	Mesothelioma	0
126	0001462641	陈连枝	Female	80	21	1740	-	-	-	+	-	-	-	-	-	-	+	-	-	-	-	-	-	-	Mesothelioma	0
127	0001463237	王风	Female	48	47.9	3456	-	-	-	-	-	-	-	-	-	-	-	-	-	-	-	-	-	-	TBP	1
128	0001463233	苟月明	Female	61	5.1	198.3	-	-	-	-	-	-	-	-	-	-	-	-	-	-	-	-	-	-	Lung adenocarcinoma	0
129	0001465662	孟凡彬	Male	25	49.1	1656	+	+	-	-	-	-	-	-	-	-	-	-	-	-	-	-	-	-	TBP	1
130	0001372746	赵兰芝	Female	81	47	2706.55	-	-	+	+	-	-	-	+	-	-	-	-	-	-	-	-	-	-	TBP	1
131	0001467497	刘建华	Male	62	30.3	290.7	+	-	-	-	-	-	-	-	-	-	-	-	-	-	-	-	-	-	TBP	1
132	0001474282	关富远	Male	41	13	1131	+	+	-	-	-	-	-	-	-	-	-	-	-	-	-	-	-	-	Lung adenocarcinoma	0
133	0001375854	吉欣璋	Male	69	54	541	-	-	+	+	-	+	-	+	-	-	-	-	-	-	-	-	-	-	Empyema	0
134	0001478459	段盛博	Male	24	49	2860	-	-	-	-	-	-	-	-	-	-	-	-	+	-	-	-	-	-	TBP	1
135	0001480912	许兰亭	Male	68	42	1899.2	-	-	+	+	-	-	-	-	-	-	-	-	-	-	-	-	-	-	TBP	1
136	0001477944	陈百敏	Male	58	8.4	719	-	-	-	-	-	-	-	-	-	-	-	-	-	-	-	-	-	-	Lung adenocarcinoma	0
137	0001480909	杨芳义	Female	72	26	853	+	-	+	+	-	-	-	-	-	-	-	-	-	-	-	-	-	-	Multiple myeloma	0
138	0001486152	孔晓涛	Male	21	46	1063	+	+	-	-	-	-	-	-	-	-	-	-	-	-	-	-	-	-	TBP	1
139	0001399909	张凤生	Male	65	52	1382	+	+	-	-	-	-	-	-	-	-	-	-	+	-	-	-	-	-	TBP	1
140	0001487294	郑勤然	Male	61	22.7	127.6	-	+	-	-	-	-	-	-	-	-	-	-	-	+	-	-	-	-	Sepsis	0
141	0001488241	李文斌	Male	20	51.7	2672	+	+	-	-	-	-	-	-	-	-	-	-	-	-	-	-	-	-	TBP	1
142	0001490160	郭运天	Male	21	31.1	5014	+	-	-	-	-	-	-	-	-	-	-	-	-	-	-	-	-	-	TBP	1
143	0001494791	王情	Female	25	39.5	2358	-	-	-	-	-	-	-	-	-	-	-	-	-	-	-	-	-	-	Thymoma	0
144	0001495710	曹佳	Female	48	39.2	6594.7	-	-	-	-	-	-	-	-	-	-	-	-	-	-	-	-	-	-	TBP	1
145	0001498764	李升	Male	83	30.1	211	-	+	-	-	-	-	+	-	-	-	+	-	-	-	-	-	-	-	Pneumonia effusion	0
146	0001510879	陈黎	Male	19	64	317.9	-	-	-	-	-	-	-	-	-	-	-	-	-	-	-	-	-	-	TBP	1
147	0001520490	瞿建勋	Male	52	10.3	74	-	-	-	-	-	-	-	-	-	-	-	-	-	-	-	-	-	-	TBP	1
148	0001525082	朱大荣	Female	45	6.2	240	-	-	-	-	-	-	-	-	-	-	-	-	-	-	-	-	-	-	TBP	1
149	0001525285	苏爱芝	Female	50	14	1990	-	-	-	-	-	-	-	-	-	-	-	-	-	-	-	-	-	-	TBP	1
150	0001526010	杨玉花	Female	52	39	1392	-	-	-	+	-	-	-	-	-	-	-	-	-	-	-	-	-	-	TBP	1
151	0001492188	殷福德	Male	73	60	39246	+	+	-	-	-	-	-	-	-	-	-	-	-	-	-	-	-	-	Empyema	0
152	0001529214	杨茂珠	Male	82	11	405	+	+	+	+	-	-	-	+	-	-	-	-	-	-	-	-	-	-	Lung adenocarcinoma	0
153	0001068194	杨留枝	Female	64	10.1	18278	-	-	-	-	-	+	-	-	-	-	-	-	-	-	-	-	-	-	Lung adenocarcinoma	0
154	0001534804	赵梅秀	Female	18	48	1346.4	-	-	-	-	-	-	-	-	-	-	-	-	-	-	-	-	-	-	TBP	1
155	0001540939	黄秀英	Female	56	42	3533	-	-	-	-	-	-	-	-	-	-	-	-	-	-	-	-	-	-	TBP	1
156	0001543043	翟灵枝	Female	58	4.8	110.7	-	-	+	-	-	-	-	-	-	-	-	-	-	-	-	-	-	-	Nephrotic syndrome	0
157	0001544727	王进宝	Male	55	48	2023.2	-	+	-	-	-	-	-	-	-	-	-	-	-	-	-	-	-	-	TBP	1
158	0001546314	王全伍	Male	80	8	968.15	-	-	-	-	-	-	-	-	-	-	-	-	-	-	-	-	-	-	Lung adenocarcinoma	0
159	0001547791	刘火生	Male	69	9	2434	-	-	-	+	-	-	-	-	+	-	-	-	-	-	-	-	-	-	Pneumonia effusion	0
160	0001558223	张红英	Female	37	40.1	1453.5	-	-	-	-	-	-	-	-	-	-	-	+	-	-	-	-	-	-	TBP	1
161	0001560032	罗改利	Female	35	58.8	0	-	-	-	-	-	-	-	-	-	-	-	-	-	-	-	-	-	-	TBP	1
162	0001530066	杨孝远	Male	26	53	433.6	-	-	-	-	-	-	-	-	-	-	-	-	-	-	+	-	-	+	TBP	1
163	0001561465	李静	Male	24	68	424	-	-	-	-	-	-	-	-	-	-	-	-	-	-	-	-	-	-	TBP	1
164	0001557634	吕保得	Male	64	93	976.5	+	+	-	-	-	-	-	-	-	-	-	-	-	-	-	-	-	-	Tuberculous pyopneumothorax	1
165	0001562841	孙开动	Male	53	60.7	2281	+	-	-	-	-	-	-	-	-	-	-	-	-	-	-	-	-	-	TBP	1
166	0001561678	徐长见	Male	66	6.6	614	+	-	-	-	-	-	-	-	-	-	-	-	-	-	-	-	-	-	Pneumonia effusion	0
167	0001564275	卞付雷	Female	35	12.3	688.8	-	-	-	-	-	-	-	-	-	+	-	-	-	-	-	-	-	-	TBP	1
168	0001886773	安一波	Male	49	127	61746	+	+	-	-	-	-	-	-	-	-	-	-	-	-	-	-	-	-	Empyema	0
169	0001890002	常小妞	Female	48	10.9	413	-	-	-	+	-	-	-	-	-	-	-	-	-	-	-	-	-	-	TBP	1
170	0001891012	张现娜	Female	36	31.7	2659	-	-	-	-	-	-	-	-	-	-	-	-	-	-	-	-	-	-	TBP	1
171	0001728258	张乐颖	Female	20	2	199	-	-	-	-	-	-	-	-	-	-	-	-	-	-	-	-	-	-	Acute glomerulonephritis	0
172	0001725690	牛春玉	Female	63	3	211	-	-	-	-	-	-	-	-	-	-	+	-	-	-	-	-	-	-	Pneumonia effusion	0
173	0001729280	刘永帅	Male	24	44	2509.2	+	-	-	-	-	-	-	-	-	-	-	-	-	-	-	-	-	-	TBP	1
174	0001694038	秦广芳	Male	77	6	1502.4	+	-	+	-	-	-	-	-	-	-	-	-	-	-	-	-	-	-	Lung adenocarcinoma	0
175	0001892063	姜玉芳	Female	57	18	1282	-	-	-	-	-	-	+	-	-	-	-	-	-	-	-	-	-	-	Lung adenocarcinoma	0
176	0001894098	宋太林	Male	69	7.1	376	+	-	-	-	-	-	+	+	-	-	-	-	-	-	-	-	-	-	Lung adenocarcinoma	0
177	0001797405	杨锦印	Male	57	6.6	3646	+	+	-	-	-	-	-	-	-	-	-	-	-	-	-	-	-	-	Lung adenocarcinoma	0
178	0001677802	朱文方	Male	61	14.9	2606	+	-	-	-	-	-	-	-	-	-	-	-	-	-	-	-	-	-	Lung adenocarcinoma	0
179	0001678225	刘俊兰	Female	65	37	5404	-	-	-	+	-	+	-	-	-	-	-	-	-	-	+	-	-	-	TBP	1
180	0001719801	申秀荣	Female	73	9	861	-	-	-	+	-	-	+	-	-	-	-	-	-	-	-	-	-	-	Lung adenocarcinoma	0
181	0001722305	孙巧丽	Female	37	35	3732	-	-	-	-	-	-	-	-	-	-	-	-	-	-	-	-	-	-	TBP	1
182	0001894921	李昂	Male	26	39	877	+	+	-	-	-	-	-	-	-	-	-	-	-	-	-	-	-	-	TBP	1
183	0001687253	刘凤英	Female	53	18.8	1413	-	-	-	+	-	-	-	-	-	-	-	-	-	-	-	-	-	-	Lung adenocarcinoma	0
184	0001694216	彭光凤	Female	62	7	679	-	-	-	+	-	-	-	-	-	-	-	-	-	-	+	-	-	-	Lung adenocarcinoma	0
185	0001749835	杨文义	Male	79	3	287	+	+	-	-	+	-	-	-	-	-	-	-	-	-	-	-	-	-	Heart failure	0
186	0001756245	侯金湘	Male	53	7	162	+	+	-	-	-	-	-	-	-	-	-	-	-	-	-	-	-	-	Small cell lung cancer	0
187	0001757659	胡锡杰	Male	62	53	29971	+	+	+	-	-	-	-	-	-	-	-	-	-	-	-	-	-	-	Empyema	0
188	0001765961	雷素霞	Female	54	10	3270	-	-	-	+	-	-	-	-	-	-	-	-	-	-	-	-	-	-	Lung adenocarcinoma	0
189	0001710549	郑晓变	Female	61	6	1719	-	-	-	-	-	-	-	-	-	-	-	-	-	-	-	-	-	-	Lung adenocarcinoma	0
190	0001810674	聂秉忠	Male	59	26	10061	+	+	+	-	-	-	-	-	-	-	-	-	-	-	-	-	-	-	Lung adenocarcinoma	0
191	0001816231	赵四妮	Female	68	22	989	-	-	+	-	-	-	-	-	-	-	-	-	-	-	-	-	-	-	Lung adenocarcinoma	0
192	0001816903	孟文山	Male	40	31	110	+	-	-	-	-	-	-	-	-	-	-	-	-	-	-	-	-	-	pulmonary contusion	0
193	0001821754	郑朝运	Male	65	5	428	+	-	-	-	-	+	-	+	-	-	-	-	-	-	-	-	-	-	Pulmonary embolism	0
194	0001823096	李付宽	Male	72	291	81310	+	+	-	-	+	-	-	-	-	-	-	-	-	-	-	-	-	-	Empyema	0
195	0001824641	郭光威	Male	28	45	4288	+	+	-	-	-	-	-	-	-	-	-	-	-	-	-	-	-	-	TBP and pulmonary TB	1
196	0001825167	米自新	Male	77	3.2	385	+	+	-	-	-	-	-	-	-	-	-	-	-	-	+	+	-	-	Heart failure	0
197	0001777997	赵俊三	Male	49	8	206	+	+	-	+	-	-	-	+	-	-	-	-	-	-	-	-	-	-	Lung adenocarcinoma	0
198	0001692932	刘石缘	Male	54	7	759	+	+	-	-	-	-	-	-	-	-	-	-	-	-	-	-	-	-	Pneumonia effusion	0
199	0001701036	杨德芩	Male	68	63	2115	-	-	+	+	-	-	-	+	-	-	-	-	-	-	-	-	-	-	Empyema	0
200	0001710257	刘西梅	Female	72	7	415	-	-	-	+	-	-	-	-	-	-	-	-	-	-	-	-	-	-	Lung adenocarcinoma	0
201	0001685806	朱秋硕	Male	24	19	1465	-	-	-	-	-	-	-	-	-	-	-	-	-	-	+	-	-	-	Lymphoma	0
202	0001690352	郑天伦	Male	80	5	114.4	-	-	-	+	-	+	-	-	-	-	-	-	-	-	-	-	-	-	Small cell lung cancer	0
203	0001696542	刘文灿	Male	67	3.8	957	+	-	-	-	-	-	-	-	-	-	-	-	-	-	-	-	-	-	Heart failure	0
204	0001702884	谭永平	Male	53	35	1768	+	-	-	+	-	-	-	-	-	-	-	-	-	-	-	-	-	-	TBP	1
205	0001709515	孙明琴	Female	62	2	79	-	-	+	-	-	-	-	-	-	-	-	-	-	-	-	-	-	-	Hypoalbuminemia	0
(+:had the disease;-:without the disease; group:1,TBP group;0,non-TBP group)
